# Supplementary material
Source: PubMed Central journal article supplement (PMC4761445)
Supplement: NIHMS759285-supplement-Supplemental_1.pdf [file NIHMS759285-supplement-Supplemental_1.pdf]

## Online Resource 1

**Article title:** “Mapping and validation QTL which confer partial resistance to broadly virulent post-2000 North American races of stripe rust in hexaploid wheat”

**Journal:** Theoretical and Applied Genetics

**Authors:** Iago Lowe, Ljupcho Jankuloski, Shiaoman Chao, Xianming Chen, Deven See, and Jorge Dubcovsky

**Name, affiliation, and email of corresponding author:**

Jorge Dubcovsky

Department of Plant Sciences, University of California, Davis

[jdubcovsky@ucdavis.edu](mailto:jdubcovsky@ucdavis.edu)

## Parental phenotypes

Typical moderately susceptible reactions of the population parents to current California races of stripe rust, as observed in the field (pictures taken during 2009 field season):

**UC1110**

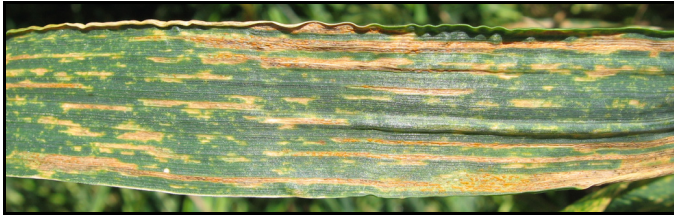

**PI610750**

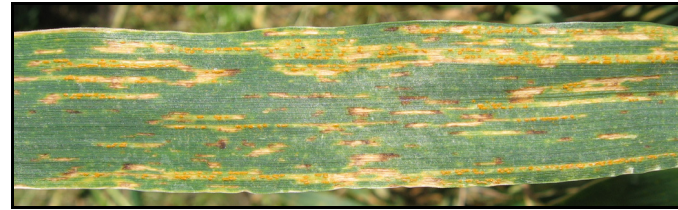

## 11-point scale

Along with disease severity (% area of leaf affected), the population of RILs was scored using an 11-point scale intended to take into account both infection type (resistant → susceptible) and severity (% leaf area affected) in a single score. The following pictures typify the levels of this 11-point scale (pictures taken during the 2010 field season). See next page for descriptions.

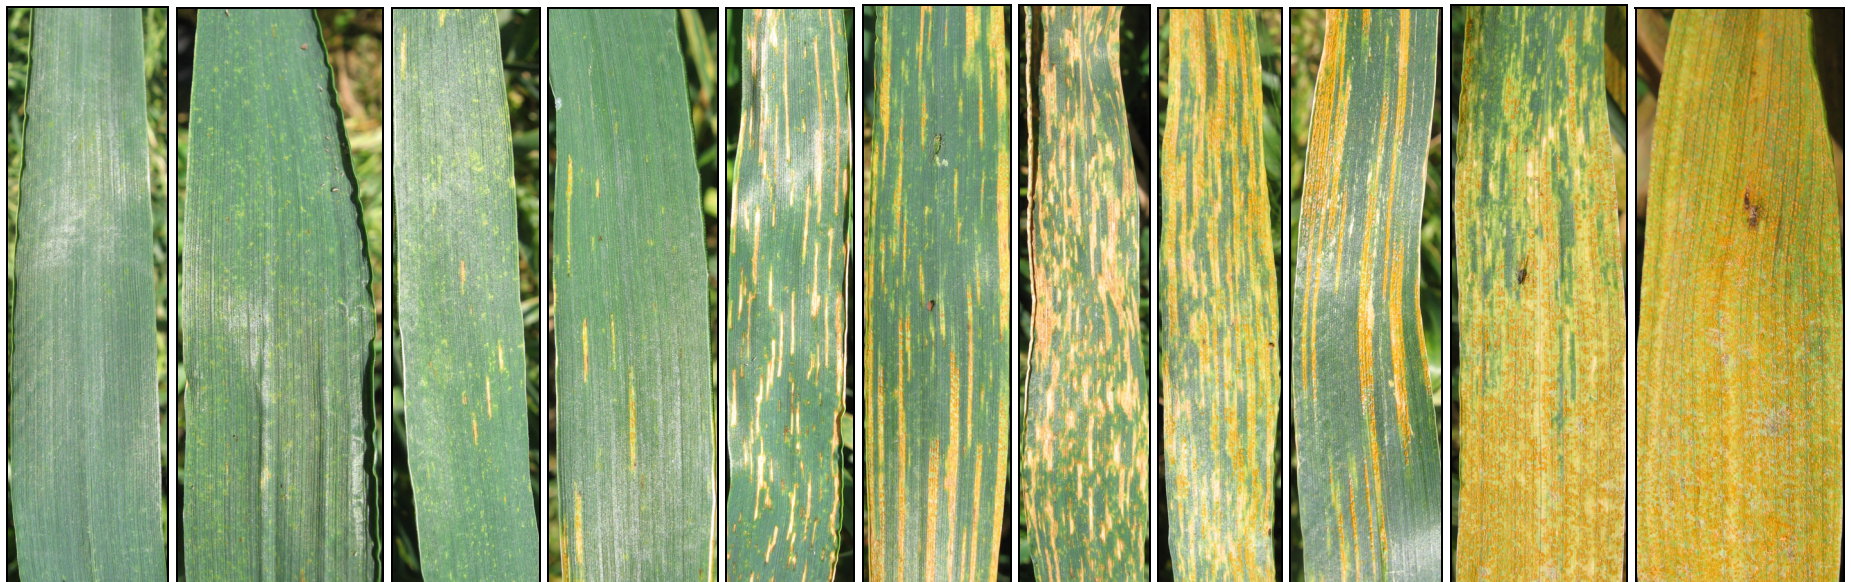

1

2

3

4

5

6

7

8

9

10

11

## Descriptions of levels

- 1** *Resistant I* No flecking, striping, or sporulation of any kind.
- 2** *Resistant II* Flecking, but no striping or sporulation of any kind.
- 3** *Moderately resistant I* Necrotic striping covering < 5% of the leaf area, with no to minimal sporulation.
- 4** *Moderately resistant II* Necrotic striping covering < 5% of the leaf area, with powdery sporulation.
- 5** *Moderately resistant/moderately susceptible I* Necrotic striping covering 5-30% of the leaf area, with no to minimal sporulation.
- 6** *Moderately resistant/moderately susceptible II* Necrotic striping covering 5-30% of the leaf area, with powdery sporulation.
- 7** *Moderately susceptible I* Necrotic striping covering > 30% of the leaf area, with no to minimal sporulation.
- 8** *Moderately susceptible II* Necrotic striping covering > 30% of the leaf area, with powdery sporulation.
- 9** *Susceptible I* Abundant sporulation without preceding necrosis, covering < 30% of leaf area.
- 10** *Susceptible II* Abundant sporulation without preceding necrosis, covering 30-70% of leaf area.
- 11** *Very Susceptible* Abundant sporulation without preceding necrosis, covering >70% of leaf area.
