# Supplementary material
Source: PubMed Central journal article supplement (PMC4761445)
Supplement: NIHMS759285-supplement-Supplemental_5.pdf [file NIHMS759285-supplement-Supplemental_5.pdf]

## Online Resource 5

**Article title:** “Mapping and validation of QTL which confer partial resistance to broadly virulent post-2000 North American races of stripe rust in hexaploid wheat”

**Journal:** Theoretical and Applied Genetics

**Authors:** Iago Lowe, Ljupcho Jankuloski, Shiaoman Chao, Xianming Chen, Deven See, and Jorge Dubcovsky

**Name, affiliation, and email of corresponding author:**

Jorge Dubcovsky  
Department of Plant Sciences, University of California, Davis  
jdubcovsky@ucdavis.edu

**Table S1 (page 1 of 3)**

**Reference Haplotypes (A = homozygous for UC1110 allele; B = homozygous for PI610750 allele):**

| Line   | 3BS<br>(A = resistant)    |                         |                            | 5AL<br>(B = resistant)    |                        |                           | 2B<br>(A = resistant) | Combined<br>3BS 5AL | Average<br>Reaction<br>Type | Average<br>Disease<br>Severity |
|--------|---------------------------|-------------------------|----------------------------|---------------------------|------------------------|---------------------------|-----------------------|---------------------|-----------------------------|--------------------------------|
|        | <i>Distal</i><br>BE446462 | <i>Peak</i><br>gwm533.1 | <i>Proximal</i><br>barc133 | <i>Proximal</i><br>wmc727 | <i>Peak</i><br>cfa2149 | <i>Distal</i><br>wPt-9800 | <i>Peak</i><br>gwm474 |                     |                             |                                |
| RIL149 | B                         | B                       | B                          | A                         | A                      | A                         | B                     | BBB AAA             | 10.9                        | 87%                            |
| RIL167 | B                         | B                       | B                          | B                         | B                      | B                         | B                     | BBB BBB             | 7.0                         | 46%                            |
| RIL233 | A                         | A                       | A                          | A                         | A                      | A                         | B                     | AAA AAA             | 4.3                         | 33%                            |

**Validation of 3BS QTL**

**Population: RIL149 / RIL233, only homozygous F2 plants tested (37)**

| F2<br>3BS 5AL<br>Haplotypes | Resistant | Susceptible |
|-----------------------------|-----------|-------------|
| AAA AAA                     | 18        | 0           |
| BBB AAA                     | 0         | 19          |

**Fisher's Exact Probability Test \***  
**p < 0.0001**

**Validation of 5AL QTL**

**Population: RIL149 / RIL167, only homozygous F2 plants tested (66)**

| F2<br>3BS 5AL<br>Haplotypes | Resistant | Susceptible |
|-----------------------------|-----------|-------------|
| BBB AAA                     | 0         | 32          |
| BBB BBB                     | 34        | 0           |

**Fisher's Exact Probability Test \***  
**p < 0.0001**

\* see <http://faculty.vassar.edu/lowry/fisher.html>

*Table caption is on the following page.*

## Table S1 (continued, page 2 of 3)

**Table S1.** The table on the previous page summarizes the results of the independent validation tests for the 3BS and 5AL QTL regions. At the top are shown reference haplotypes for all the lines used in these crosses: RIL149 (a completely susceptible line), RIL167 (a line carrying only the 5AL resistance), and RIL233 (a line carrying only the 3BS resistance). Shorthand "3BS|5AL" haplotypes are defined for easy reference in the two contingency tables of results.

1. To validate the 3BS QTL region, a population was developed from the cross RIL149/RIL233. Within this population, 19 F<sub>2</sub> plants were found to be homozygous for the RIL149 (i.e. susceptible) haplotype in the 3BS QTL region and 18 F<sub>2</sub> plants were found to be homozygous for the RIL233 (i.e. resistant) haplotype in the 3BS QTL region. These 37 plants were then inoculated in the greenhouse at booting stage with field spores harvested during the 2009 growing season (Davis site). 21 days after inoculation, each plant was evaluated for its reaction and classified as either resistant or susceptible (see images on next page). As the contingency table shows, reaction type segregated perfectly with haplotype, confirming the presence of an effect of the 3BS QTL region on stripe rust resistance.

2. To validate the 5AL QTL region, a population was developed from the cross RIL149/RIL167. Within this population, 32 F<sub>2</sub> plants were found to be homozygous for the RIL149 (i.e. susceptible) haplotype in the 5AL QTL region and 34 F<sub>2</sub> plants were found to be homozygous for the RIL167 (i.e. resistant) haplotype in the 5AL QTL region. These 66 plants were then inoculated in the greenhouse at booting stage with field spores harvested during the 2009 growing season (Davis site). 21 days after inoculation, each plant was evaluated for its reaction and classified as either resistant or susceptible (see images on next page). As the contingency table shows, reaction type segregated perfectly with haplotype, confirming the presence of an effect of the 5AL QTL region on stripe rust resistance.

*Images of typical reactions from these screens are on the following page.*

**Table S1 (continued, page 3 of 3)**

**Typical Reactions**

**3BS validation screen**

SUSCEPTIBLE

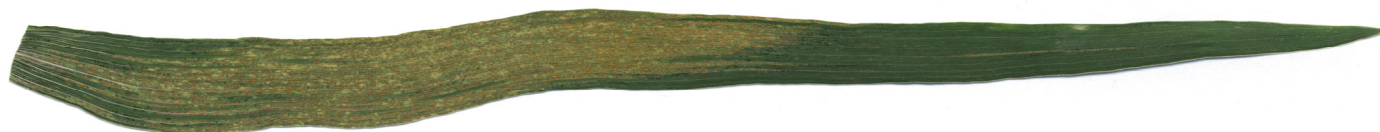

3BS RESISTANT

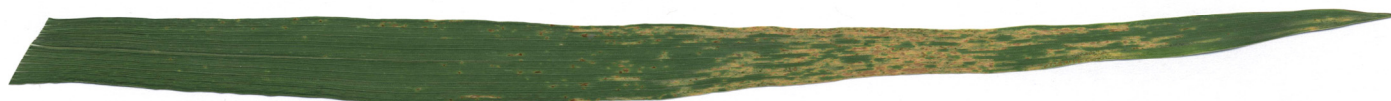

**5AL validation screen**

SUSCEPTIBLE

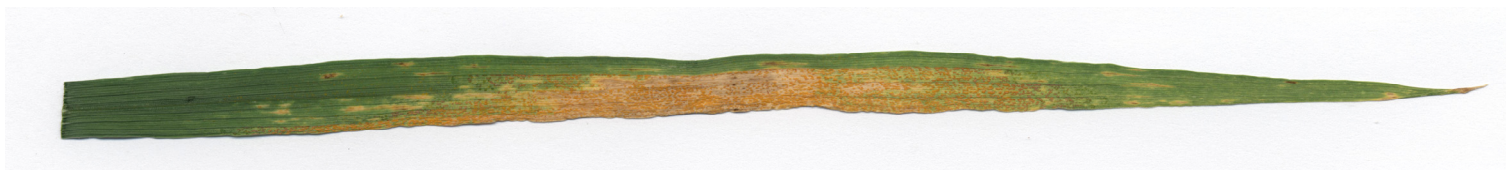

5AL RESISTANT

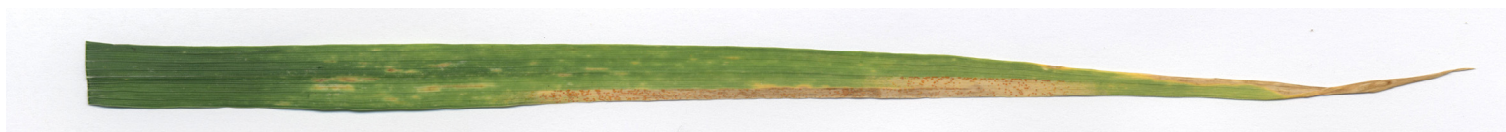

**Table S2**

Reference Haplotypes (A = homozygous for UC1110 allele; B = homozygous for PI610750 allele):

| Line                                                                                              | 3BS<br>(A = resistant)    |                         |                            | 5AL<br>(B = resistant)    |                        |                           | 2B<br>(A = resistant)     |                       |                          | Average<br>Reaction<br>Type | Average<br>Disease<br>Severity |
|---------------------------------------------------------------------------------------------------|---------------------------|-------------------------|----------------------------|---------------------------|------------------------|---------------------------|---------------------------|-----------------------|--------------------------|-----------------------------|--------------------------------|
|                                                                                                   | Distal<br><i>BE446462</i> | Peak<br><i>gwm533.1</i> | Proximal<br><i>barc133</i> | Proximal<br><i>wmc727</i> | Peak<br><i>cfa2149</i> | Distal<br><i>wPt-9800</i> | Proximal<br><i>gwm429</i> | Peak<br><i>gwm474</i> | Distal<br><i>barc230</i> |                             |                                |
| e.g. RIL233                                                                                       | A                         | A                       | A                          | A                         | A                      | A                         | B                         | B                     | B                        | 4.3                         | 33%                            |
| <b>3BS QTL Recombinants</b>                                                                       |                           |                         |                            |                           |                        |                           |                           |                       |                          |                             |                                |
| <i>Evidence for BE446462 as distal flanking marker</i>                                            |                           |                         |                            |                           |                        |                           |                           |                       |                          |                             |                                |
| RIL199                                                                                            | A                         | B                       | B                          | B                         | B                      | B                         | A                         | A                     | A                        | 7.3                         | 48%                            |
| RIL178                                                                                            | A                         | B                       | B                          | B                         | B                      | -                         | B                         | B                     | B                        | 6.7                         | 43%                            |
| RIL204                                                                                            | A                         | B                       | B                          | B                         | B                      | B                         | A                         | A                     | A                        | 6.5                         | 27%                            |
| <i>Evidence for barc133 as proximal flanking marker (see progeny test in Table S3, next page)</i> |                           |                         |                            |                           |                        |                           |                           |                       |                          |                             |                                |
| RIL160                                                                                            | A                         | A                       | B                          | B                         | B                      | B                         | B                         | B                     | B                        | 1.8                         | 1%                             |
| <b>5AL QTL Recombinants</b>                                                                       |                           |                         |                            |                           |                        |                           |                           |                       |                          |                             |                                |
| <i>Evidence for wmc727 as proximal flanking marker</i>                                            |                           |                         |                            |                           |                        |                           |                           |                       |                          |                             |                                |
| RIL150                                                                                            | B                         | B                       | B                          | B                         | A                      | A                         | A                         | B                     | B                        | 10.9                        | 91%                            |
| RIL243                                                                                            | B                         | B                       | B                          | A                         | B                      | -                         | B                         | B                     | B                        | 7.0                         | 38%                            |
| <i>Evidence for wPt-9800 as distal flanking marker</i>                                            |                           |                         |                            |                           |                        |                           |                           |                       |                          |                             |                                |
| RIL86                                                                                             | B                         | B                       | B                          | B                         | B                      | A                         | B                         | B                     | B                        | 6.2                         | 38%                            |
| <b>2B QTL Recombinants</b>                                                                        |                           |                         |                            |                           |                        |                           |                           |                       |                          |                             |                                |
| <i>Evidence for gwm429 as proximal flanking marker</i>                                            |                           |                         |                            |                           |                        |                           |                           |                       |                          |                             |                                |
| RIL149                                                                                            | B                         | B                       | B                          | A                         | A                      | A                         | A                         | B                     | B                        | 10.9                        | 87%                            |
| RIL150                                                                                            | B                         | B                       | B                          | B                         | A                      | A                         | A                         | B                     | B                        | 10.9                        | 91%                            |
| RIL193                                                                                            | B                         | B                       | B                          | A                         | A                      | A                         | B                         | B                     | B                        | 10.9                        | 99%                            |
| RIL194                                                                                            | B                         | B                       | B                          | A                         | A                      | A                         | B                         | A                     | A                        | 7.0                         | 68%                            |
| <i>Evidence for barc230 as distal flanking marker</i>                                             |                           |                         |                            |                           |                        |                           |                           |                       |                          |                             |                                |
| RIL72                                                                                             | B                         | B                       | B                          | A                         | A                      | A                         | B                         | B                     | A                        | 10.8                        | 98%                            |

**Table S2.** This table summarizes and presents a schematic visualization of the QTL dissection information described in the text. Specifically, presented here are the QTL haplotypes and average phenotypic scores of all RILs from the mapping population that provide evidence for the flanking markers of the three QTL regions.

**Table S3**

Reference Haplotypes (A = homozygous for UC1110 allele; B = homozygous for PI610750 allele):

| Line   | 3BS<br>(A = resistant)    |                         |                            | 5AL<br>(B = resistant)    |                        |                           | 2B<br>(A = resistant) | Combined<br>3BS 5AL | Average<br>Reaction<br>Type | Average<br>Disease<br>Severity |
|--------|---------------------------|-------------------------|----------------------------|---------------------------|------------------------|---------------------------|-----------------------|---------------------|-----------------------------|--------------------------------|
|        | Distal<br><i>BE446462</i> | Peak<br><i>gwm533.1</i> | Proximal<br><i>barc133</i> | Proximal<br><i>wmc727</i> | Peak<br><i>cfa2149</i> | Distal<br><i>wPt-9800</i> | Peak<br><i>gwm474</i> |                     |                             |                                |
| RIL233 | A                         | A                       | A                          | A                         | A                      | A                         | B                     | AAA AAA             | 4.3                         | 33%                            |
| RIL149 | B                         | B                       | B                          | A                         | A                      | A                         | B                     | BBB AAA             | 10.9                        | 87%                            |
| RIL160 | A                         | A                       | B                          | B                         | B                      | B                         | B                     | AAB BBB             | 1.8                         | 1%                             |

**Validation of *barc133* as proximal marker for 3BS QTL**

Population 1: RIL149 / RIL160, only homozygous F2 plants tested (6)

Population 2: RIL 233 / RIL160, only homozygous F2 plants tested (12)

| F2<br>3BS 5AL<br>Haplotypes | Resistant | Susceptible |
|-----------------------------|-----------|-------------|
| AAB AAA                     | 11        | 0           |
| BBB AAA                     | 0         | 2           |
| AAA AAA                     | 5         | 0           |

**Fisher's Exact Probability Test  
(Freeman-Halton extension to 2x3 tables) \***  
p = 0.007

\* <http://faculty.vassar.edu/lowry/fisher2x3.html>

**Table S3.** To validate *barc133* as the proximal flanking marker for the 3BS QTL region, two populations were developed (RIL149/RIL160 and RIL160/RIL233). In the first population, 2 F<sub>2</sub> plants were found to be homozygous 5AL-susceptible and homozygous for the RIL149 haplotype in the 3BS QTL region; and 4 F<sub>2</sub> plants were found to be homozygous 5AL-susceptible and homozygous for the RIL160 haplotype in the 3BS QTL region. In the second population, 5 F<sub>2</sub> plants were found to be homozygous 5AL-susceptible and homozygous for the RIL233 haplotype in the 3BS QTL region; and 7 F<sub>2</sub> plants were found to be homozygous 5AL-susceptible and homozygous for the RIL160 haplotype in the 3BS QTL region. These 18 plants were then inoculated in the greenhouse at booting stage with field spores harvested during the 2009 growing season (Davis site). 21 days after inoculation, each plant was evaluated for its reaction and was classified as either resistant or susceptible (see images below). As the contingency table shows, reaction type segregated perfectly with haplotype, confirming *barc133* as a proximal marker.
